# Supplementary material
Source: publisher figshare collection journal article supplement (https://aacr.figshare.com/articles/dataset/_/22406621)
Supplement: Supplementary file 1 [file 39852491]

**Supplementary Table S1. Final concentrations of gemcitabine in the culture medium corresponding to each cycle.**

| <b>Cycle No.</b> | <b>Final concentration (nM)</b> |
|------------------|---------------------------------|
| 1                | 12                              |
| 2                | 36                              |
| 3                | 72                              |
| 4                | 144                             |
| 5                | 216                             |
| 6                | 288                             |
| 7                | 360                             |
| 8                | 432                             |
| 9                | 504                             |
| 10               | 576                             |
| 11               | 648                             |
| 12               | 720                             |

**Supplementary Table S2. Nucleotide sequences of PCR primers used for amplification of ALDH1A3, CDA, DST, FMO3, MAOA, PTHLH, XDH, UGT1A1, hENT1, NT5C, DCK, DCTD, CMPK1, NME1.**

| <b>Primer</b>  | <b>Orientation</b> | <b>Sequence</b>               | <b>PCR Product Size</b> | <b>Gene Bank Accession No.</b> |
|----------------|--------------------|-------------------------------|-------------------------|--------------------------------|
| <u>ALDH1A3</u> | sense              | 5'-TCTCGACAAAGCCCTGAAGT-3'    | 149bp                   | NM_000693.2                    |
|                | antisense          | 5'-TATTCGGCCAAAGCGTATTC-3'    |                         |                                |
| <u>CDA</u>     | sense              | 5'-CTGAAGCCTGAGTGTGTCCA-3'    | 224bp                   | NM_001785.2                    |
|                | antisense          | 5'-TGCCCTGAAATCCTTGTACC-3'    |                         |                                |
| <u>DST</u>     | sense              | 5'-CGGTGGCAAGGTTGATACTT-3'    | 229bp                   | NM_001144769.2                 |
|                | antisense          | 5'-CCACCGCAATAGGTTTCAGAT-3'   |                         |                                |
| <u>FMO3</u>    | sense              | 5'-ATCCCATGGCTGTTTCTCAC-3'    | 179bp                   | NM_001002294.2                 |
|                | antisense          | 5'-CTGAAGTCTCCCGACCACTC-3'    |                         |                                |
| <u>MAOA</u>    | sense              | 5'-CACACCTTTTGGGAAATGCT-3'    | 203bp                   | NM_000240.3                    |
|                | antisense          | 5'-TGGACTGGCATTTCATTTGA-3'    |                         |                                |
| <u>PTHLH</u>   | sense              | 5'-CTCGCTCTGCCTGGTTAGAC-3'    | 245bp                   | NM_198965.1                    |
|                | antisense          | 5'-CTCCAAAACCCAGCTGAGAG-3'    |                         |                                |
| <u>XDH</u>     | sense              | 5'-TGACATTGCCAAGGTAACCA-3'    | 130bp                   | NM_000379.3                    |
|                | antisense          | 5'-GCCTCTGAGTGGTCTTGAGG-3'    |                         |                                |
| <u>UGT1A1</u>  | sense              | 5'-CATGCTGGGAAGATACTGTTGAT-3' | 203bp                   | NM_000463.2                    |
|                | antisense          | 5'-GCCCGAGACTAACAAAAGACTC     |                         |                                |
| <u>hENT1</u>   | sense              | 5'-AAAGGAGAGGAGCCAAGAGC-3'    | 270bp                   | NM_001078177.1                 |
|                | antisense          | 5'-GGCCCAACCAAGTCAAAGATA-3'   |                         |                                |
| <u>NT5C</u>    | sense              | 5'-GAGATGAACGACCTACCGGAC-3'   | 168bp                   | NM_014595.2                    |
|                | antisense          | 5'-GGCCTCGAACTGTGTCCCTTG-3'   |                         |                                |
| <u>DCK</u>     | sense              | 5'-AAAGCTGGCTCCTGCATAGG-3'    | 176bp                   | NM_000788.2                    |
|                | antisense          | 5'-ACCATTTGGCTGCCTGTAGT-3'    |                         |                                |
| <u>DCTD</u>    | sense              | 5'-GTGCGGACCCAACATGAGT-3'     | 203bp                   | NM_001012732.1                 |
|                | antisense          | 5'-ACGTCATCACTGCACCCATT-3'    |                         |                                |
| <u>CMPK1</u>   | sense              | 5'-GTCTCATGAAGCCGCTGGTC-3'    | 110bp                   | NM_016308.2                    |
|                | antisense          | 5'-CTCCTGCAGAAAGGTGTGTGT-     |                         |                                |
| <u>NME1</u>    | sense              | 5'-CTAAGTCAGCCTGGTGTGCAG-3'   | 200bp                   | NM_198175.1                    |
|                | antisense          | 5'-TCACAGTTGGCCATGGTTCC-3'    |                         |                                |

**Supplementary Table S3 Selected Genes Related to Drug Metabolism/Resistance according to the GO analysis.**

| <b>Gene ID</b> | <b>Gene Symbol</b> | <b>Description</b>                                   | <b>Fold Change<sup>a</sup></b> |
|----------------|--------------------|------------------------------------------------------|--------------------------------|
| 220            | ALDH1A3            | Aldehyde dehydrogenase 1 family,member A3            | 3.04                           |
| 978            | CDA                | Cytidine deaminase                                   | 3.22                           |
| 667            | DST                | Cystonin                                             | 4.23                           |
| 2328           | FMO3               | Flavin containing monooxygenase 3                    | 21.11                          |
| 4128           | MAOA               | Monoamine oxidase A                                  | 3.01                           |
| 5744           | PTH1H              | Parathyroid hormone hormone                          | 7.17                           |
| 54658          | UGT1A1             | UDP glucuronosyltransferase 1 family, polypeptide A1 | 4.47                           |
| 7498           | XDH                | Xanthine dehydrogenase                               | 7.02                           |

Note: <sup>a</sup> Based on the microarray data.

**Supplemental Table S4. Clinicopathological variables and CDA expression in the studied cases**

| Variables          | Number of patients | CDA expression |               | P value      |
|--------------------|--------------------|----------------|---------------|--------------|
|                    |                    | Low<br>n (%)   | High<br>n (%) |              |
| Total              | 193                | 75 (39%)       | 118 (61%)     |              |
| Age (years)        |                    |                |               | 0.876        |
| <50                | 94                 | 36 (38%)       | 58 (62%)      |              |
| ≥50                | 99                 | 39 (39%)       | 60 (61%)      |              |
| Menopausal status  |                    |                |               | 0.993        |
| Premenopausal      | 85                 | 33 (39%)       | 52 (61%)      |              |
| Postmenopausal     | 108                | 42 (39%)       | 66 (61%)      |              |
| Tumor size (cm)    |                    |                |               | 0.150        |
| < 2 cm             | 179                | 67 (37%)       | 112 (63%)     |              |
| ≥2 cm              | 12                 | 7 (58%)        | 5 (42%)       |              |
| Cannot be measur   | 2                  | 1 (50%)        | 1 (50%)       |              |
| ER status          |                    |                |               | <b>0.017</b> |
| Negative           | 91                 | 27 (30%)       | 64 (70%)      |              |
| Positive           | 101                | 47 (47%)       | 54 (53%)      |              |
| Unknown            | 1                  | 1 (100%)       | 0             |              |
| PR status          |                    |                |               | 0.077        |
| Negative           | 130                | 45 (35%)       | 85 (65%)      |              |
| Positive           | 60                 | 28 (47%)       | 32 (53%)      |              |
| Unknown            | 3                  | 2 (67%)        | 1 (33%)       |              |
| HER-2 status       |                    |                |               | 0.767        |
| Negative           | 96                 | 36 (38%)       | 60 (62%)      |              |
| Positive           | 96                 | 38 (40%)       | 58 (60%)      |              |
| Unknown            | 1                  | 1 (100%)       | 0             |              |
| Lymph node status  |                    |                |               | 0.611        |
| Negative           | 117                | 47 (40%)       | 70 (60%)      |              |
| Positive           | 74                 | 27 (36%)       | 47 (64%)      |              |
| Unknown            | 2                  | 1 (50%)        | 1 (50%)       |              |
| Histological Grade |                    |                |               | 0.149        |
| I & II             | 149                | 62 (42%)       | 87 (58%)      |              |
| III                | 44                 | 13 (30%)       | 31 (70%)      |              |
| TNM stage          |                    |                |               | 0.811        |
| I & II             | 159                | 61 (38%)       | 98 (62%)      |              |
| III                | 32                 | 13 (41%)       | 19 (59%)      |              |
| Unknown            | 2                  | 1 (50%)        | 1 (50%)       |              |

Notes: P-value was calculated using Pearson's  $\chi^2$  test.

Bold values are significant ( $P < 0.05$ ).

Abbreviations: ER, estrogen receptor; PR, progesterone receptor; HER-2, human epidermal growth factor receptor 2; CDA, cytidine deaminase; TNM, tumor, node, metastasis.

**Supplemental Table S5. Univariate and multivariate analysis of DFS**

| Variables          | Univariate analysis |              | Multivariate analysis |              |
|--------------------|---------------------|--------------|-----------------------|--------------|
|                    | HR (95% CI)         | P value      | HR (95% CI)           | P value      |
| Age                | 1.005(0.537-1.884)  | 0.986        |                       |              |
| Menopausal status  | 1.767(0.908-3.439)  | 0.094        | 1.992(0.989-4.011)    | 0.054        |
| Histological grade | 1.821(0.977-3.395)  | 0.059        | 2.285(1.158-4.508)    | <b>0.017</b> |
| Stage              | 1.802(1.110-2.927)  | <b>0.017</b> |                       |              |
| Tumor size         | 1.652(0.983-2.778)  | 0.058        |                       |              |
| Lymph node status  | 2.507(1.315-4.778)  | <b>0.005</b> | 2.620(1.344-5.106)    | <b>0.005</b> |
| ER status          | 0.671(0.356-1.263)  | 0.216        |                       |              |
| PR status          | 0.452(0.199-1.023)  | 0.057        |                       |              |
| HER-2/neu status   | 0.891(0.475-1.670)  | 0.718        |                       |              |
| CDA                | 0.485(0.257-0.918)  | <b>0.026</b> | 0.375(0.193-0.732)    | <b>0.004</b> |

Notes: Bold values are significant ( $P < 0.05$ )

Abbreviations: CI, confidence interval; HR, hazard ratio; ER, estrogen receptor; HER-2, human epidermal growth factor receptor 2; CDA, cytidine deaminase.
